# Supplementary material for: Continuous Cultivation as a Method to Assess the Maximum Specific Growth Rate of Photosynthetic Organisms
Source: Front Bioeng Biotechnol. 2019 Oct 17;7:274. doi: 10.3389/fbioe.2019.00274 (PMC6811504; doi:10.3389/fbioe.2019.00274)
Supplement: Supplementary file 1 [file Table_1.DOCX]

Continuous cultivation as a method to assess the maximum specific growth rate of photosynthetic organisms

Elena Barbera1,2, Alessia Grandi1, Lisa Borella2, Alberto Bertucco2 , Eleonora Sforza1*

1Interdepartmental Centre Giorgio Levi Cases, Via Marzolo 9, 35131 Padova, Italy

2Department of Industrial Engineering DII, University of Padova, Via Marzolo 9, 35131 Padova, Italy

*** Correspondence:**Eleonora Sforza, PhD
[eleonora.sforza@unipd.it](mailto:eleonora.sforza@unipd.it)
Tel.: +39-0498275462; fax: +39-0498275461

Table S1: Composition of BG11 and BG110 cultivation media

| **Component** | **BG110** | **BG11** |
| --- | --- | --- |
| **(mg/L)** | **(mg/L)** |
| ***Na2Mg EDTA*** | 2 | 2 |
| ***FeCl3 . 6 H2O*** | 12.43 | 12.43 |
| ***Citric acid . 1 H2O*** | 12 | 12 |
| ***CaCl2 . 2 H2O*** | 72 | 72 |
| ***MgSO4 . 2 H2O*** | 150 | 150 |
| ***K2HPO4 . 3 H2O*** | 189 | 189 |
| ***Na2CO3*** | 0.04 | 0.04 |
| ***H3BO3*** | 11.44 | 11.44 |
| ***MnCl2 . 4 H2O*** | 7.24 | 7.24 |
| ***ZnSO4 . 7 H2O*** | 0.88 | 0.88 |
| ***CuSO4 . 5 H2O*** | 0.316 | 0.316 |
| ***CoCl2 . 6 H2O*** | 0.2 | 0.2 |
| ***NaMoO4 . 2 H2O*** | 1.56 | 1.56 |
| ***NaNO3*** | - | 3000 |
| ***NaHCO3*** | 2500 | 2500 |


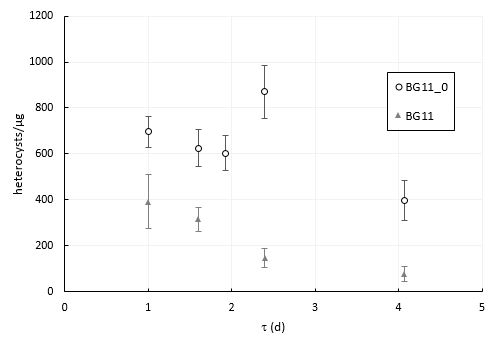


Figure S1: heterocysts concentration (n° heterocysts/μg) as a function of residence time at 650 μmol m-2 s-1 in *Anabaena* PCC7122 cultivated in BG11 (grey triangles) and BG110 (open circles)


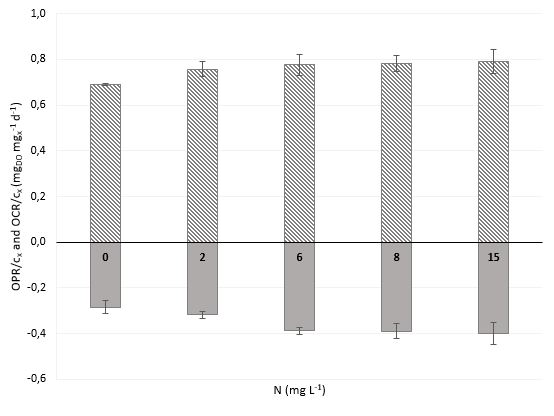


Figure S2: Specific OPR (diagonal pattern) and OCR (grey) as a function of N concentration
